# Supplementary material
Source: Research Square preprint supplement (doi:10.21203/rs.3.rs-7930444/v1)

# TSLP and $\beta$ -actin

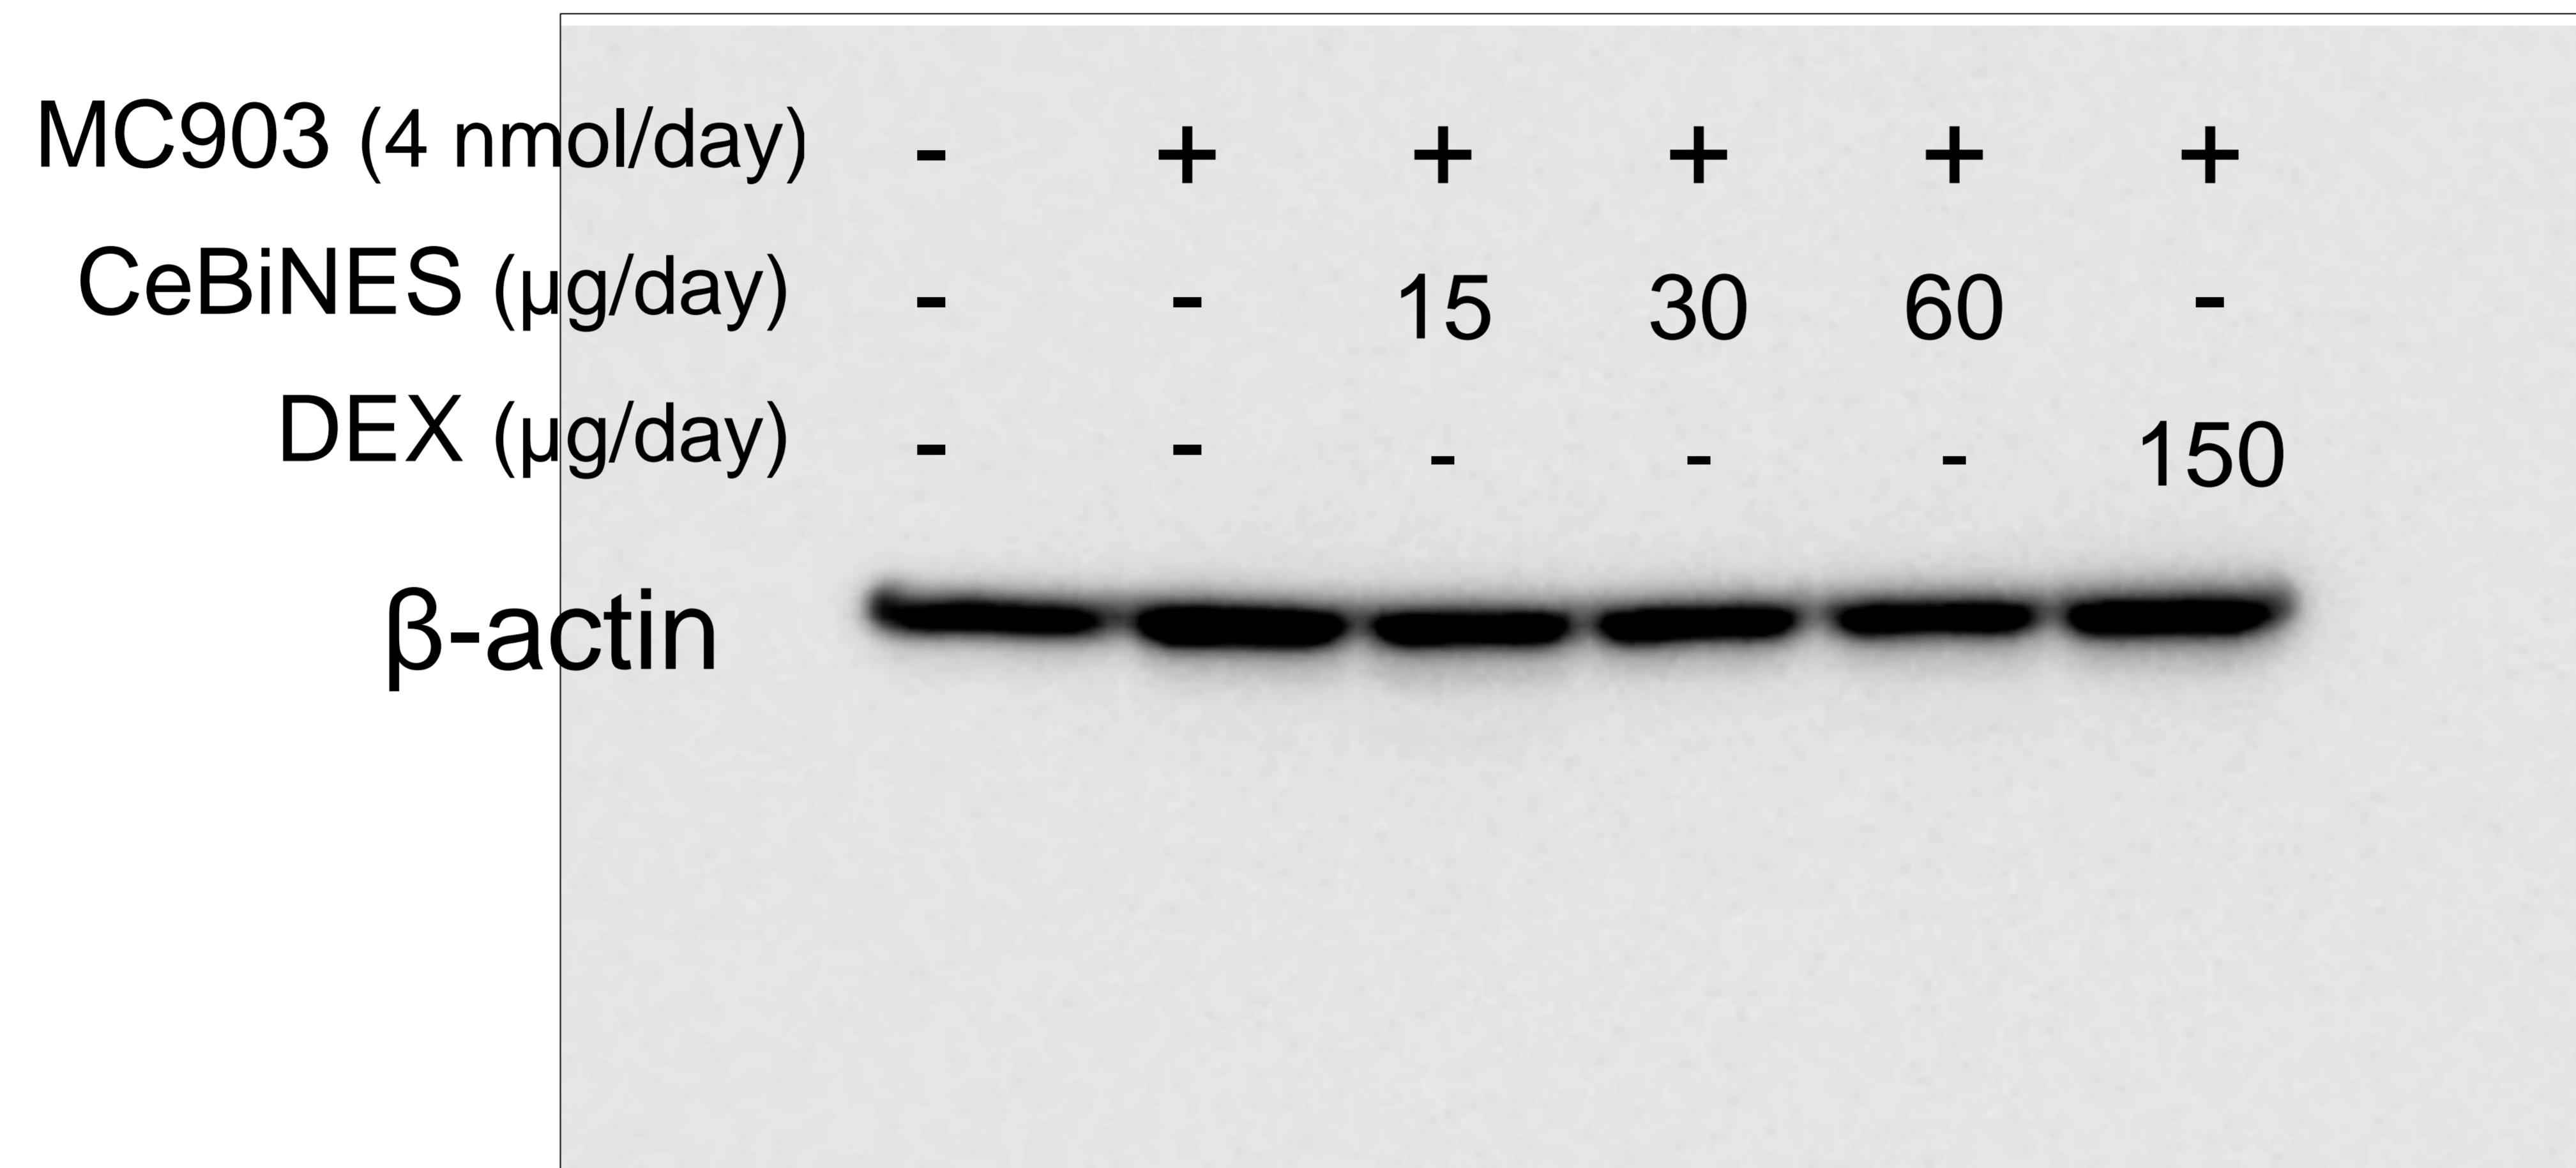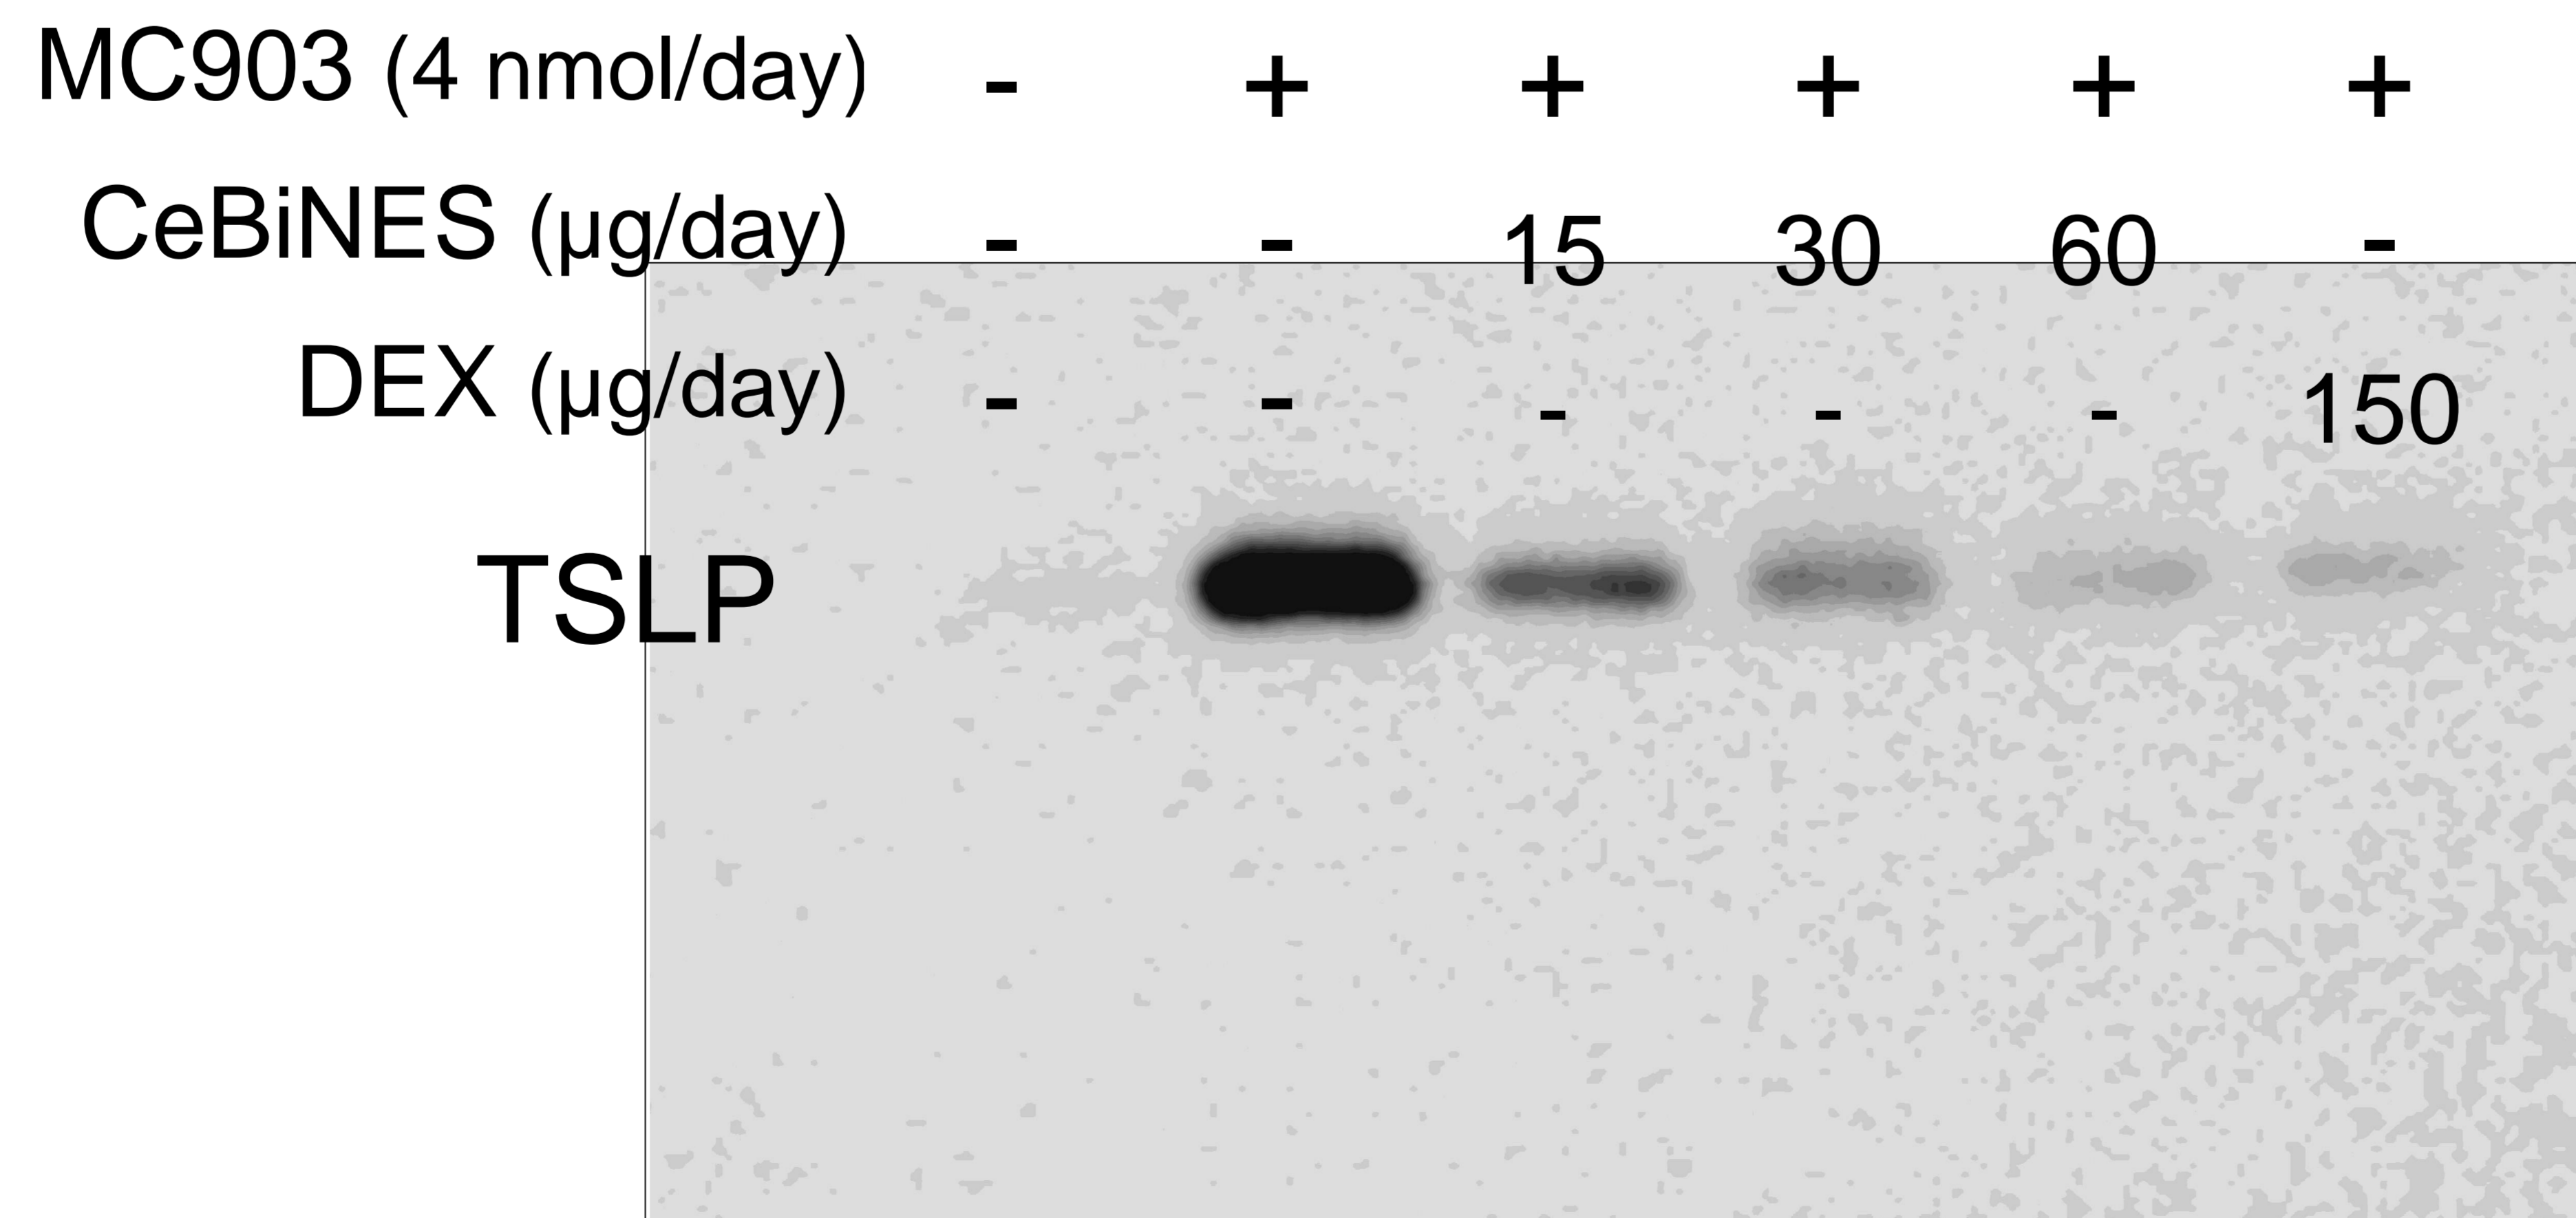

# ERK and P-ERK

---

|                               |   |   |    |    |    |     |
|-------------------------------|---|---|----|----|----|-----|
| MC903 (4 nmol/day)            | - | + | +  | +  | +  | +   |
| CeBiNES ( $\mu\text{g/day}$ ) | - | - | 15 | 30 | 60 | -   |
| DEX ( $\mu\text{g/day}$ )     | - | - | -  | -  | -  | 150 |

P-ERK

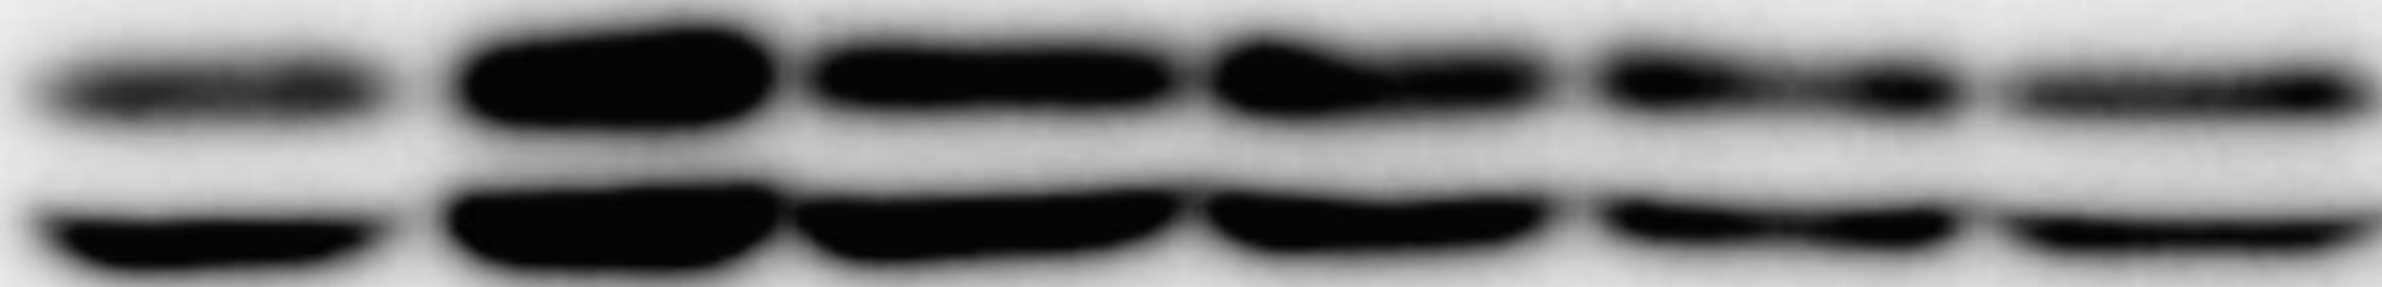

|                               |   |   |    |    |    |     |
|-------------------------------|---|---|----|----|----|-----|
| MC903 (4 nmol/day)            | - | + | +  | +  | +  | +   |
| CeBiNES ( $\mu\text{g/day}$ ) | - | - | 15 | 30 | 60 | -   |
| DEX ( $\mu\text{g/day}$ )     | - | - | -  | -  | -  | 150 |

ERK

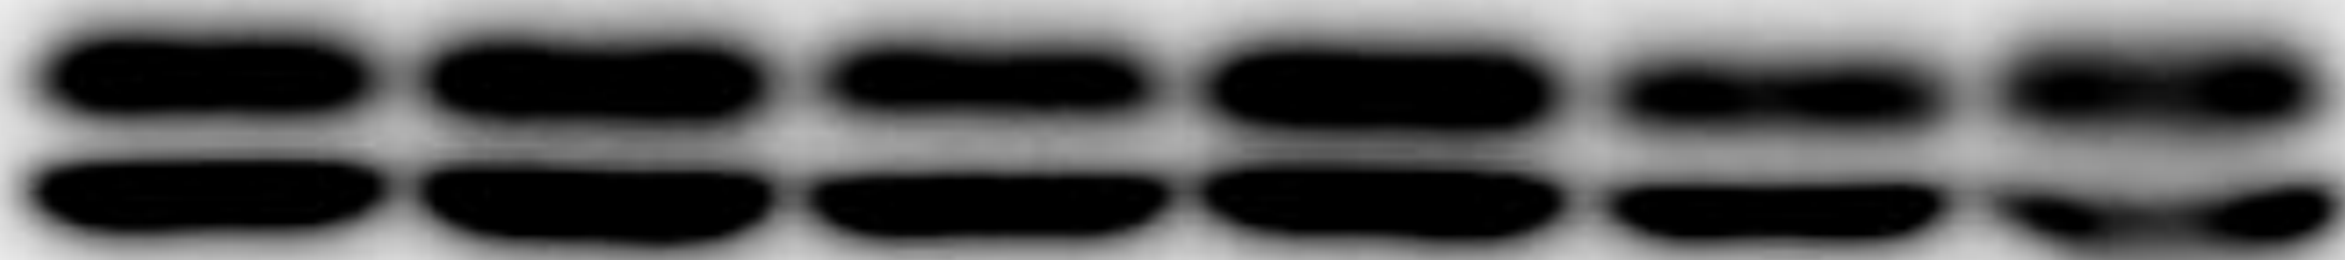

# P38 and Pp38

|                               |   |   |    |    |    |     |
|-------------------------------|---|---|----|----|----|-----|
| MC903 (4 nmol/day)            | - | + | +  | +  | +  | +   |
| CeBiNES ( $\mu\text{g/day}$ ) | - | - | 15 | 30 | 60 | -   |
| DEX ( $\mu\text{g/day}$ )     | - | - | -  | -  | -  | 150 |

P-p38

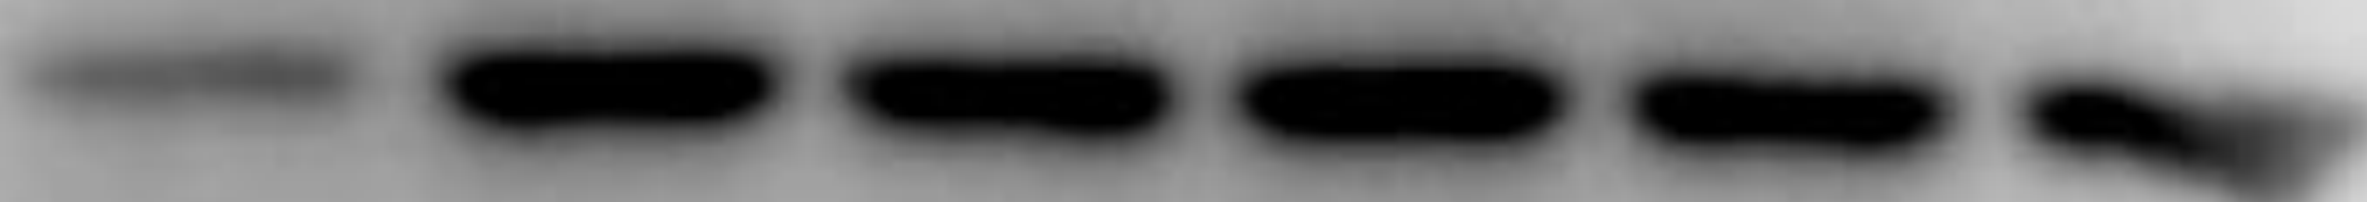

|                               |   |   |    |    |    |     |
|-------------------------------|---|---|----|----|----|-----|
| MC903 (4 nmol/day)            | - | + | +  | +  | +  | +   |
| CeBiNES ( $\mu\text{g/day}$ ) | - | - | 15 | 30 | 60 | -   |
| DEX ( $\mu\text{g/day}$ )     | - | - | -  | -  | -  | 150 |

p38

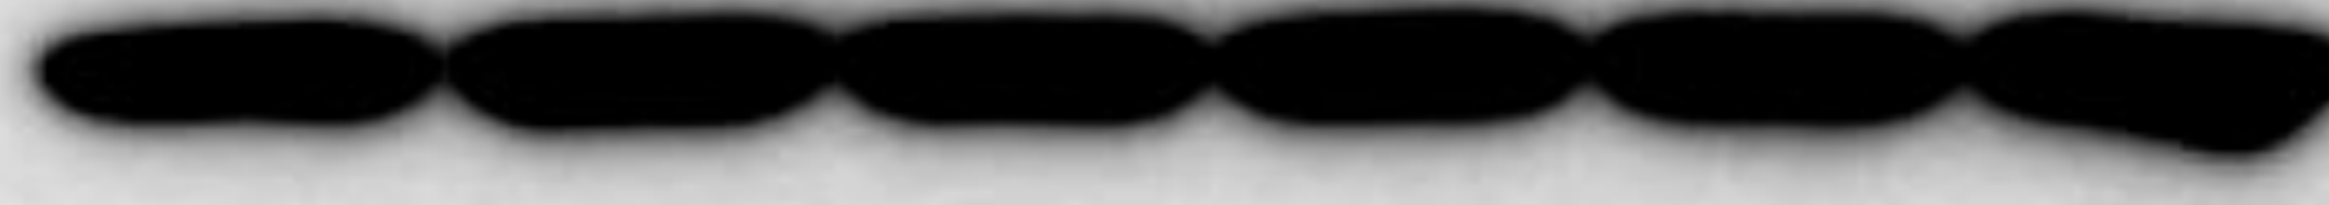

# Fig. JNK, PJNK and b-actin

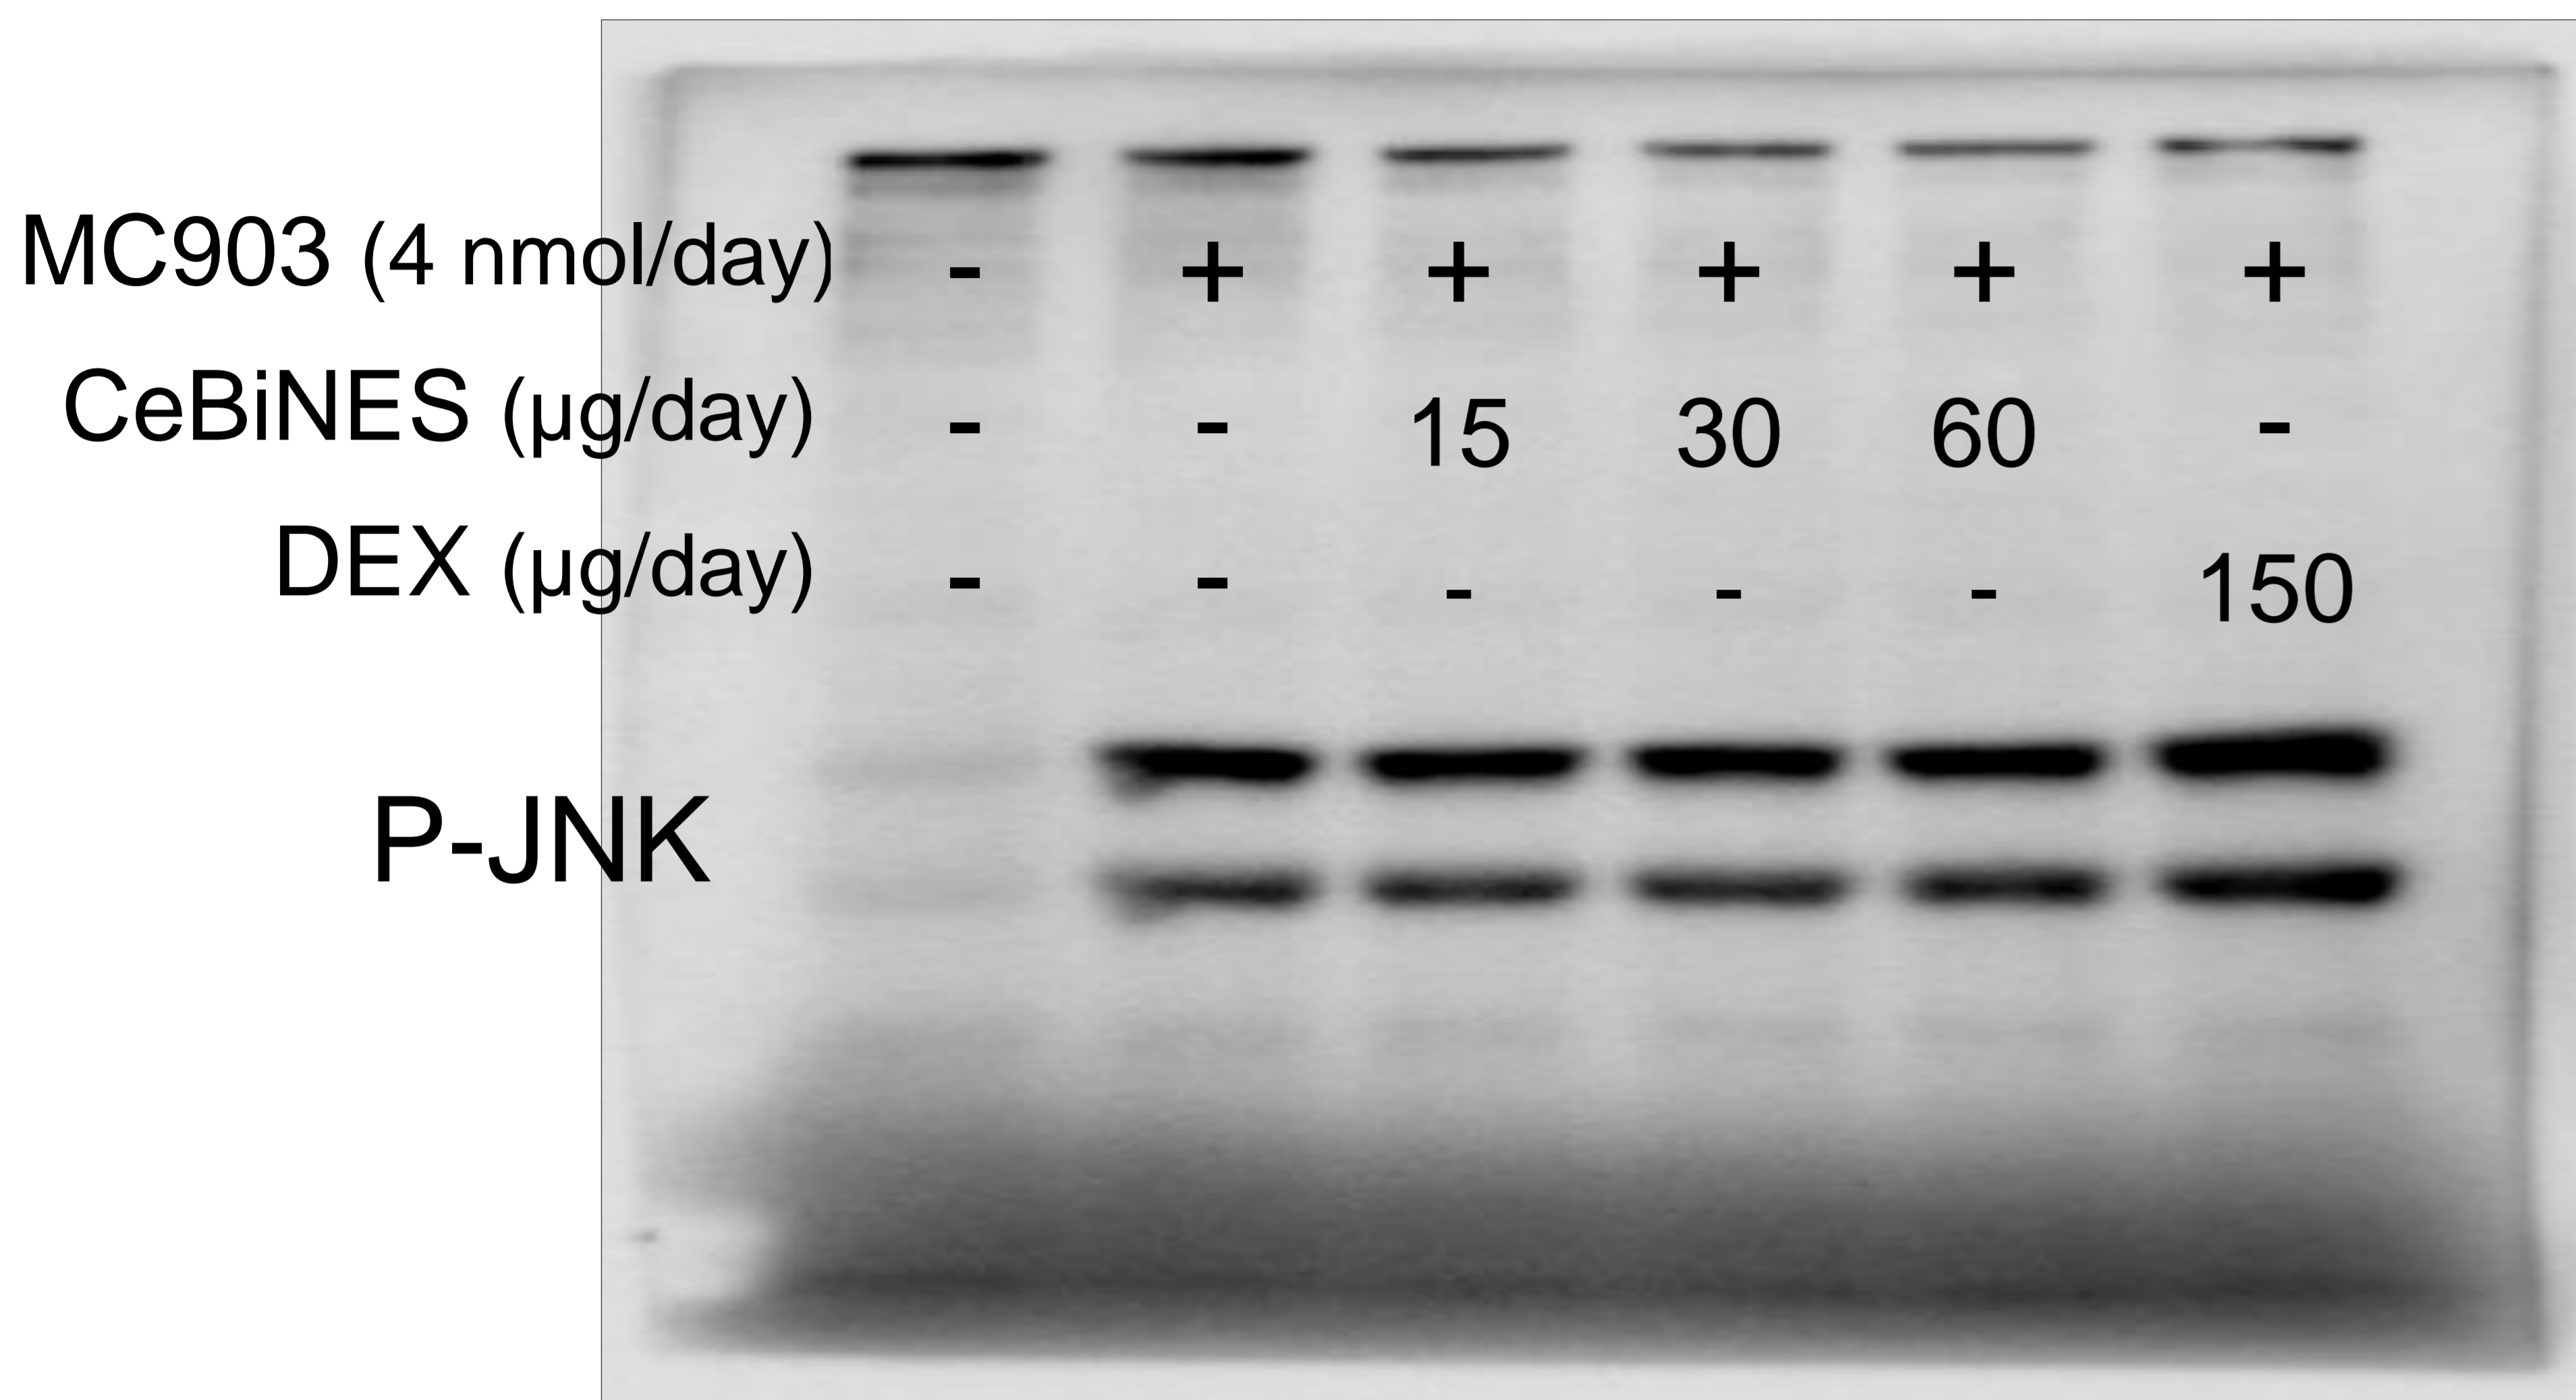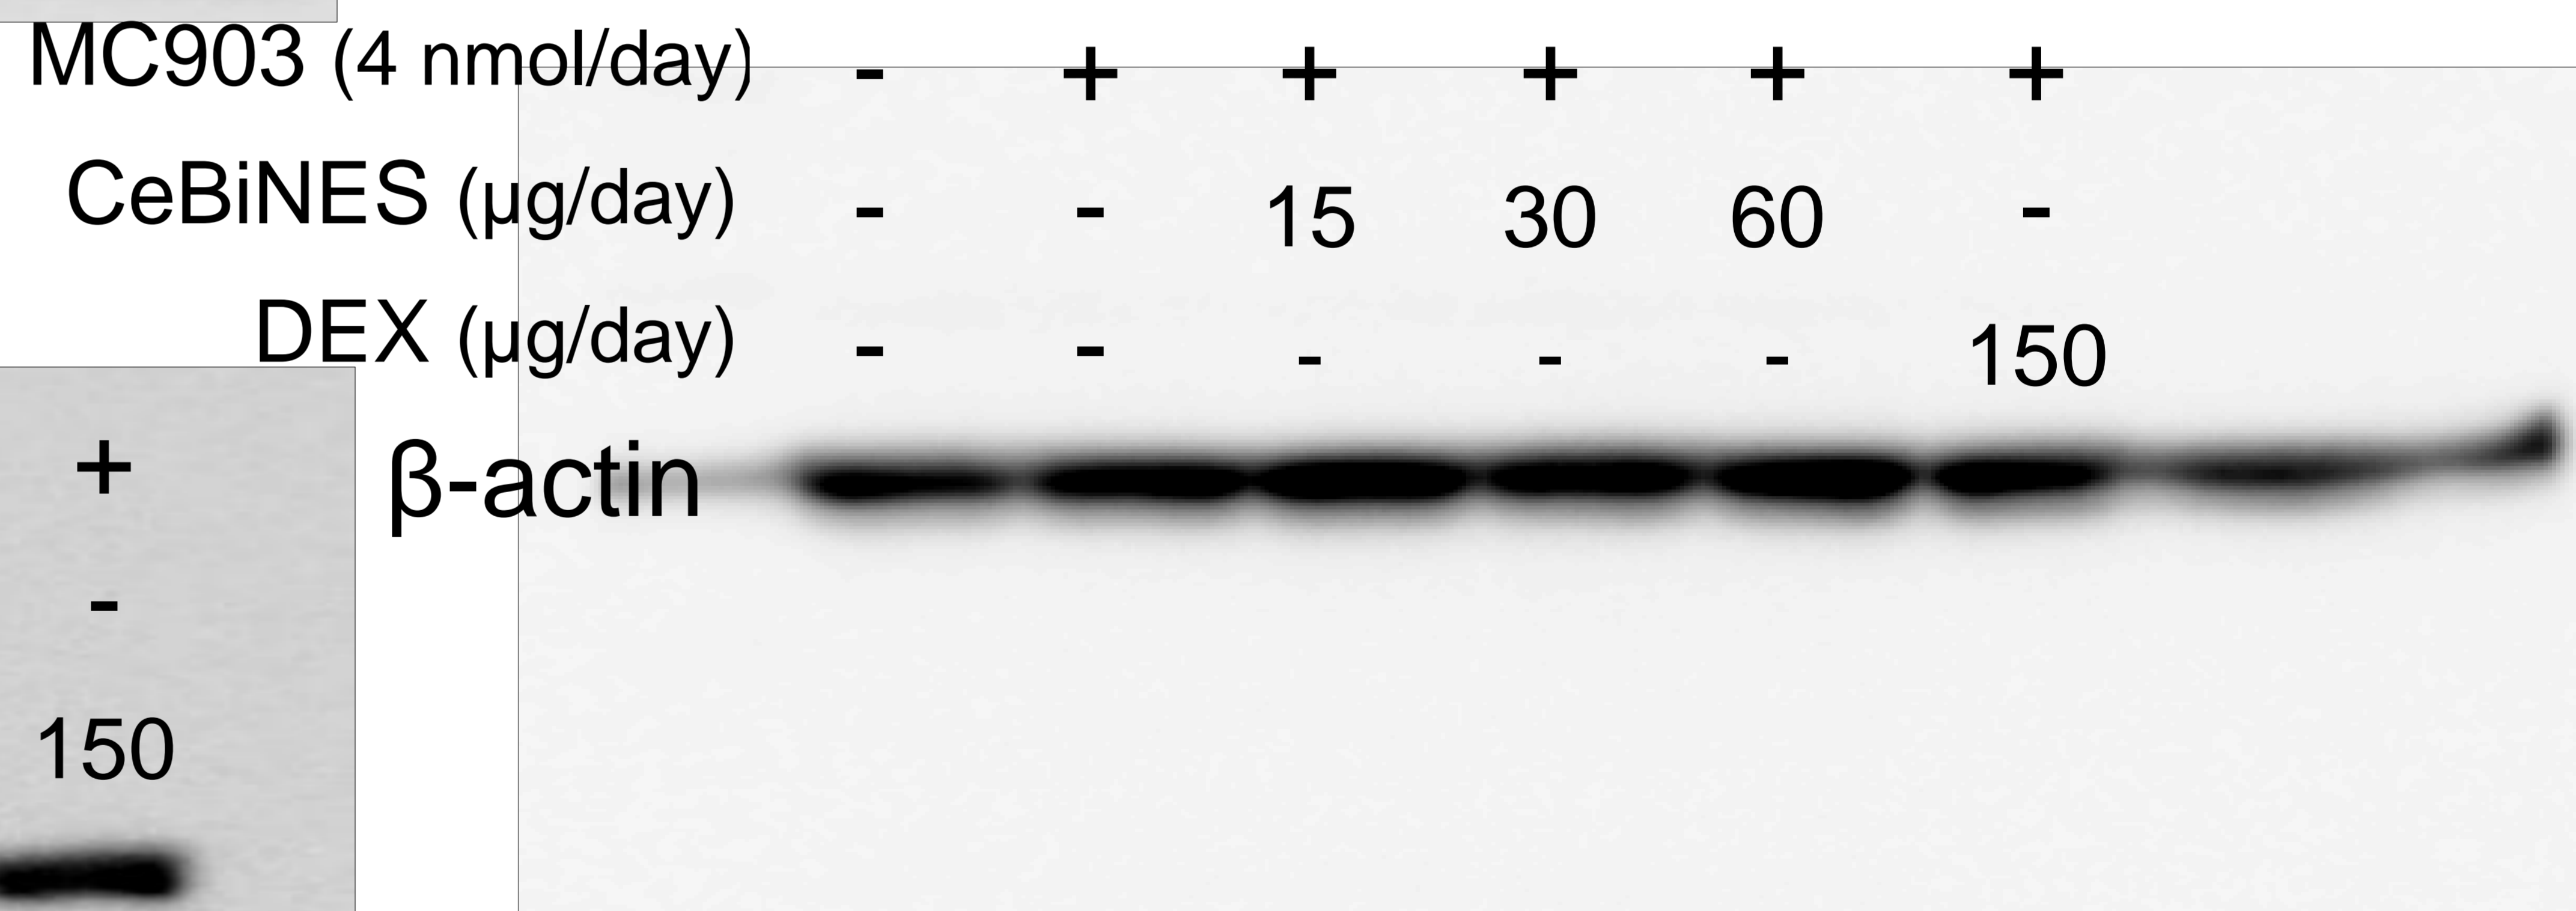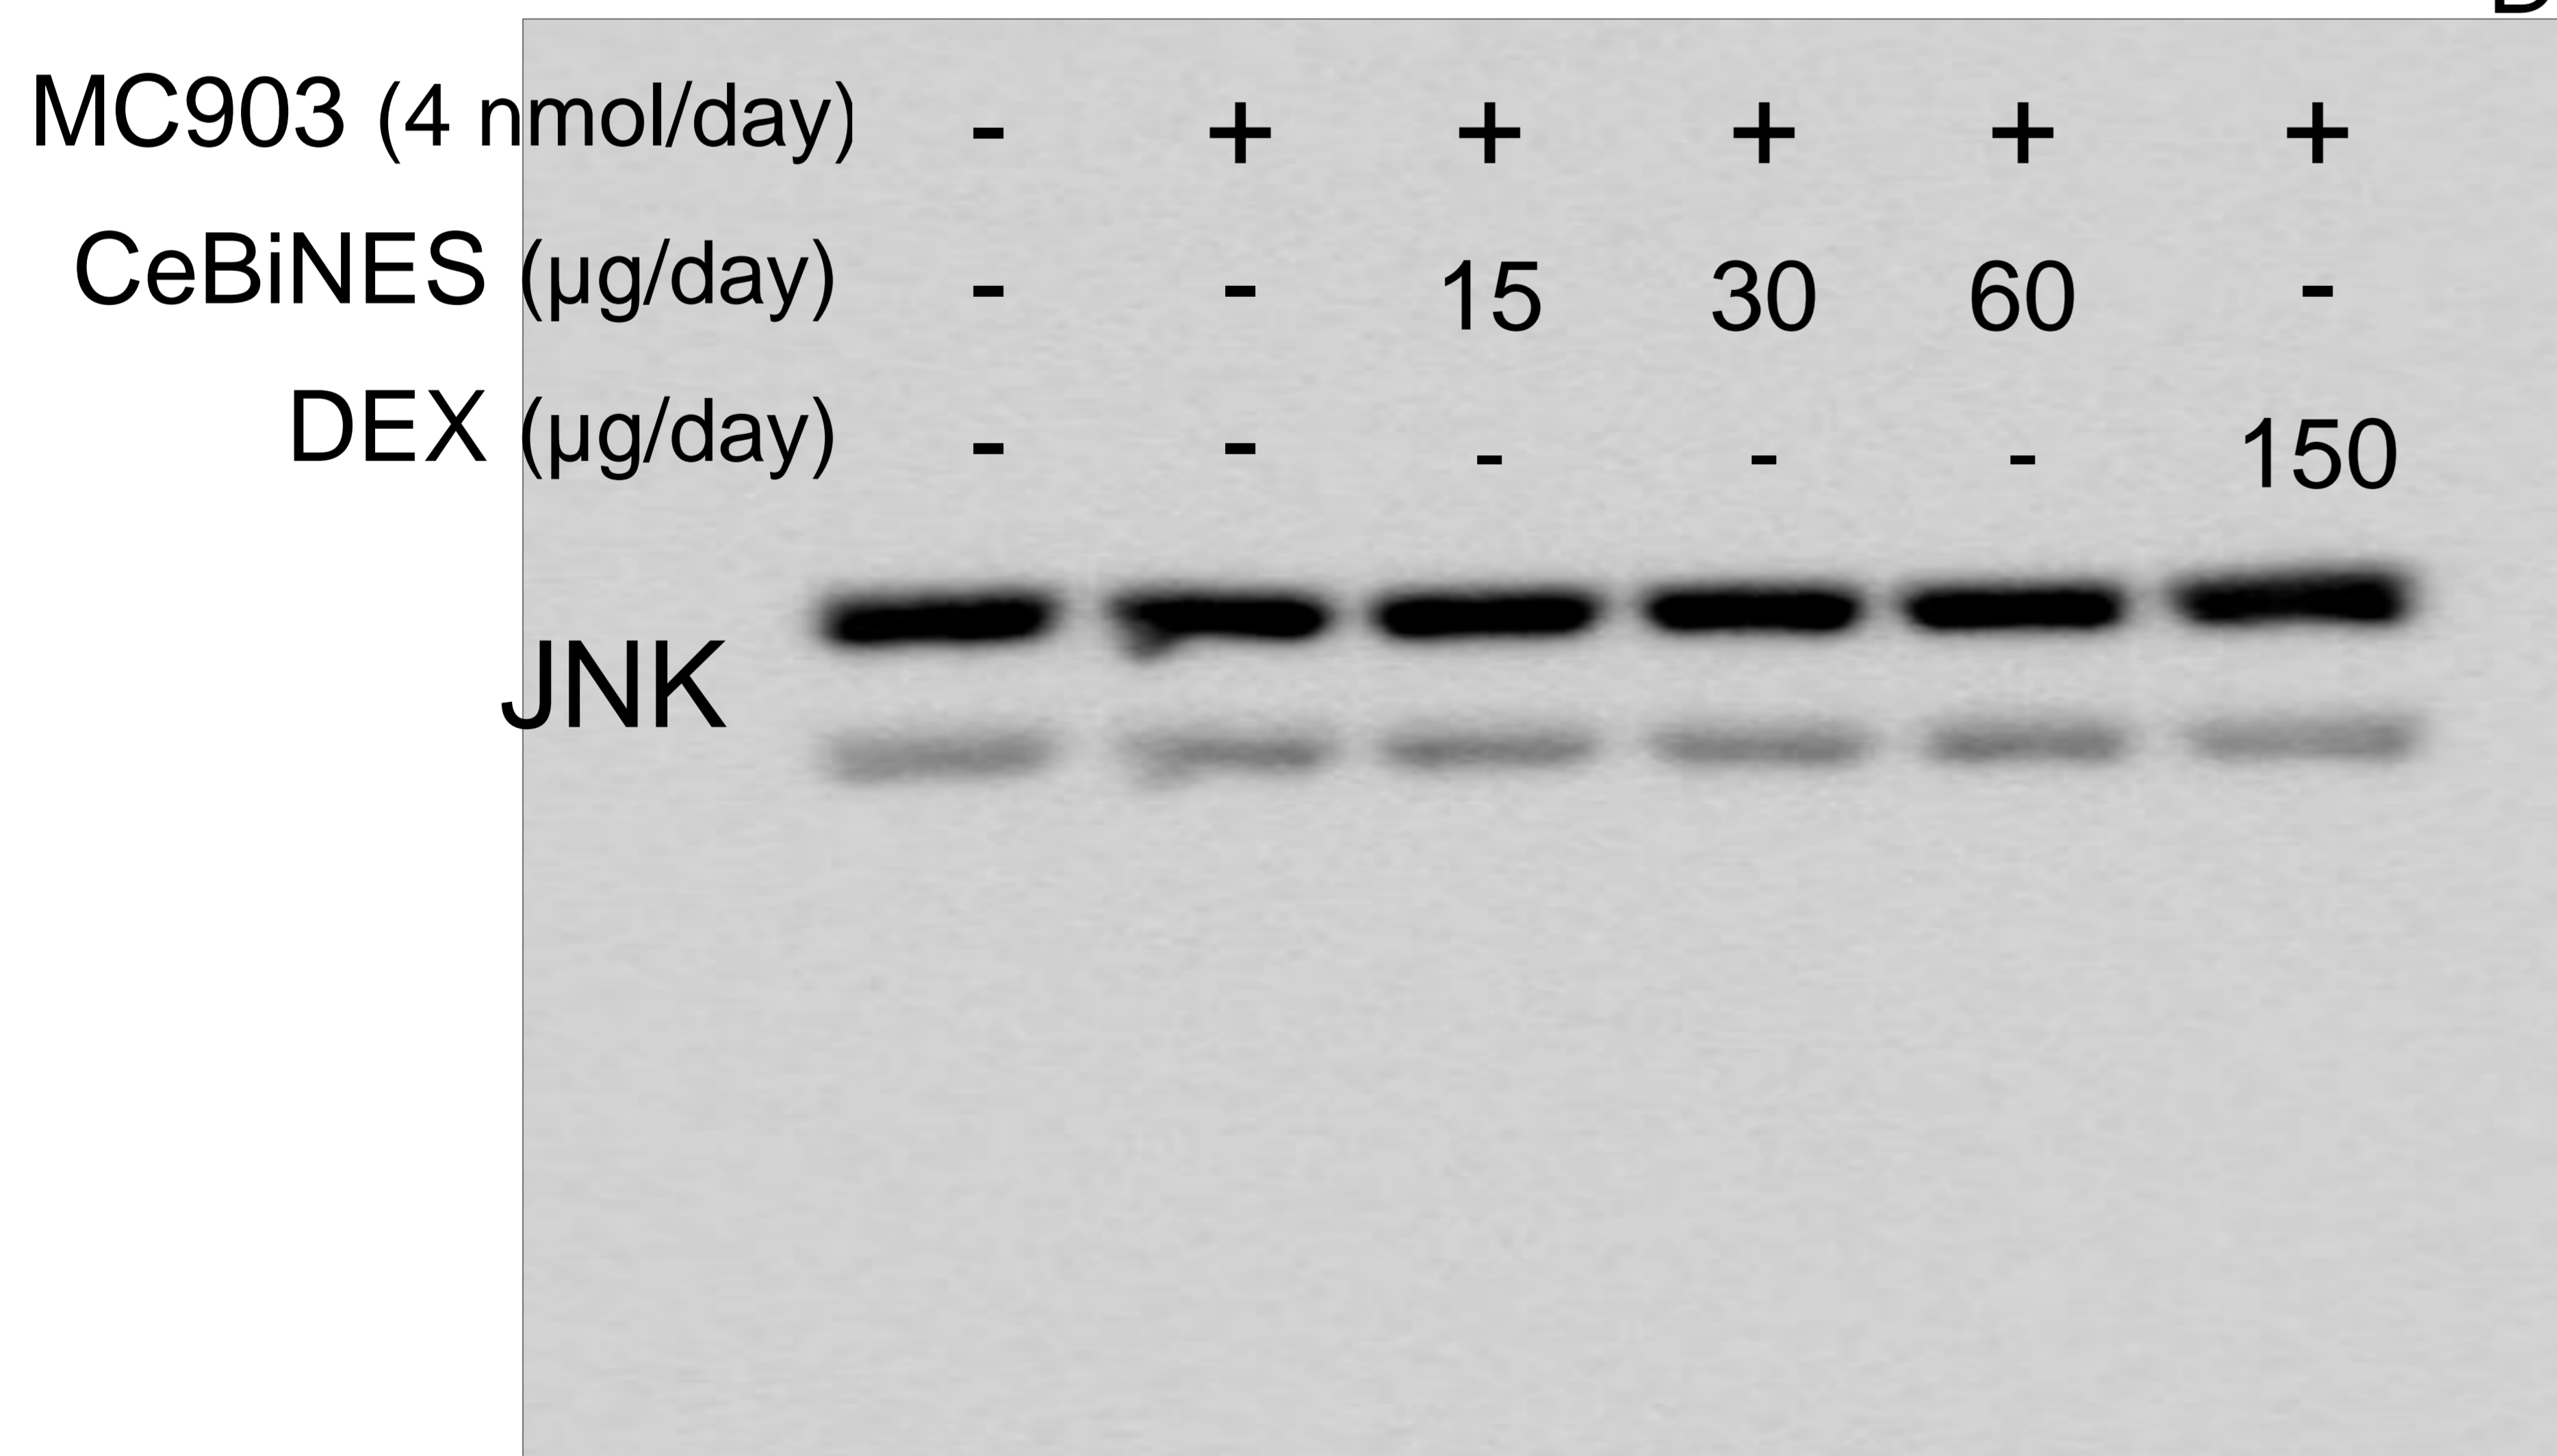

Supplement: Supplementary file 1 [file 830fdfb1e685800421ad9c4a.pdf]
